# Supplementary material
Source: publisher figshare collection journal article supplement (https://sage.figshare.com/ndownloader/files/23899500)
Supplement: Supplementary file 1 [file 23899500]

**Theme: Roles, responsibilities and future in the care of the older people**

**I. Interview outline (manager / care workers / nursing professional)**

1. What's your opinion on the role of different people, residential care and organizations in nursing for the older people?

Older people:

Children:

Caregiver:

Professional:

Manager:

Community Volunteer Organization:

2. What is your view of the responsibility of the residential care?

Older people:

Children:

Caregiver:

Professional:

Manager:

Community Volunteer Organization:

3. What is your opinion on the willingness to care for the older person and smart older care in the future?

Care needs: (existing / future)

Pension model:

Smart old-age care: robotic old-age care, smart home, old-age aids, etc.

4. How do you view the role positioning between traditional filial piety culture and residential care?

Their respective roles, functions, and how to effectively link them

5. What do you think about the physical limitations and neglect of the older people in

the residential care? Can you give examples?

Example: How to solve the dilemma of a semi-incapacitated older person (need to use crutches or a wheelchair) who always wants to run out without any aids? Are there other problems in practice that make you feel dilemma? How to resolve the conflict with the elderly?

6. In the practice of old-age care, what are the important ethical principles that you think need to be followed? the most important is? the reason? Can you give examples?

Examples: caring, respect, dignity, equality, autonomy, privacy, trust, empathy, responsibility, cross-cultural awareness conflict

7. What is the biggest challenge you encountered in the older adults care process? What is your suggestion or countermeasure?

Example: When an organization implements a certain decision, how should the elderly deal with it if they object? Are there any other examples?

8. Finally, do you have anything to add to the role, responsibilities and future of elderly care?

For example: How to treat the problem of the elderly taking care of their grandchildren?

## **II. Interview outline (children of the older adult)**

1. The frequency you visit your parents

2. How about your views towards filial piety

3. Have you done your duty in taking care of your parents

4. What are the changes in your life after taking care of your parents

5. What is the biggest challenge you encounter in the caring process?

Theme: Roles, responsibilities and future in the care of the elderly

### III. Interview outline (old people)

#### 1. Understand the basic information and family status of the elderly

Basic information: age \_\_\_\_\_ education level \_\_\_\_\_ marriage \_\_\_\_ previous work \_\_\_\_\_ (with or without pension)

Family information:

Number of children and occupation \_\_\_\_\_ Number of grandchildren \_\_\_\_\_ Have you taken care of grandchildren before \_\_\_\_\_

#### 2. Check in:

When to stay \_\_\_\_\_; why choose this institution \_\_\_\_\_ (reason to stay);

What do the children think of living here? \_\_\_\_\_

Overall satisfaction \_\_\_\_\_; do you feel free at home or in the nursing home \_\_\_\_\_ . Do you find some rules and regulations in the nursing home unreasonable? The reason is? \_\_\_\_\_

#### 3. Social support:

Visiting situation of relatives and friends: Video Chat with children \_\_\_\_\_; What help \_\_\_\_\_; Are you happy to see your children or grandchildren coming to see you \_\_\_\_\_.

Help from members / volunteers in the organization (what daily care services are available) \_\_\_\_\_;

Which do you think is more important for your help? Still indispensable? (Try to illustrate)

#### 4. Economic support:

How much does it cost you to stay in a residential care every month? \_\_\_\_\_;

Who will bear the expenses and medical expenses? \_\_\_\_\_ Is the economic burden big? \_\_\_\_\_; If the country introduced long-term care insurance to help you

reduce the financial burden of old-age care, how do you feel? \_\_\_\_\_

5. Health status:

Whether there is a disease \_\_\_\_\_ what disease \_\_\_\_\_, medication situation \_\_\_\_\_; audiovisual \_\_\_\_\_; whether to use auxiliary equipment \_\_\_\_\_; daily activity ability \_\_\_\_\_; instrumental daily activity ability \_\_\_\_\_; cognitive status \_\_\_\_\_

6. Care needs:

What are your current needs for food, clothing, housing, transportation, entertainment, and medical treatment? Can \_\_\_\_\_ be satisfied in the organization? \_\_\_\_\_; Are there unmet needs? \_\_\_\_\_ (try to illustrate)

7. A sense of responsibility:

Do you think the caregivers / nursing professionals / managers of the institution are seriously responsible in the service process? \_\_\_\_\_ Have you encountered any conflicts or dilemmas? \_\_\_\_\_ If so, how was it solved? (Try to illustrate)

For example: Is there any situation where the staff of the institution does not allow you to buy medicine to eat? Are you unwilling to use crutches but forced to use it by agency service personnel? Are there other examples?

8. What do you think are some of the service standards of caregivers, such as (care, respect, equality, autonomy, respect for privacy, trust, empathy, responsibility, etc.), which are more important? the most important is? (Try to illustrate)

9. What else you would like to say? For example, some little stories happened among you and the staffs in residential care, which made you feel happy, moved or unhappy.
